# Supplementary material
Source: ML conference proceedings conference paper supplement (https://openaccess.thecvf.com/content/CVPR2024/html/He_DYSON_Dynamic_Feature_CVPR_2024_paper.html)
Supplement: Supplementary file 1 [file He_DYSON_Dynamic_Feature_CVPR_2024_supplemental.pdf]

# DYSON: Dynamic Feature Space Self-Organization for Online Task-Free Class Incremental Learning

Anonymous CVPR submission

Paper ID 11291

## Appendices

### A. The proof of Theorem 1

**Theorem 1.** *During incremental learning, the DNC algorithm extends a simplex ETF with  $K$  prototypes  $\mathbf{Z}$  to one with  $K + C$  prototypes  $\mathbf{Z}'$  without loss of the geometry optimality, i.e., the prototypes in  $\mathbf{Z}'$  satisfy:*

$$\forall i, j, \mathbf{z}^{i'T} \mathbf{z}^{j'} = \frac{K+C}{K+C-1} \delta_{i,j} - \frac{1}{K+C-1}, \quad (1)$$

where  $\delta_{i,j} = 1$  if  $i = j$  and  $\delta_{i,j} = 0$  for the opposite.

**Proof.** Taking the  $K + C$  class centers collected in  $\mathcal{P} = \{\mathbf{p}^1, \dots, \mathbf{p}^{K+C}\}$ , where each element  $\mathbf{p}^i \in \mathbb{R}^{d \times 1}$  denote the within-class mean of the features of class  $i$ . Following the proposed DNC algorithm, we first concatenate the class centers into a matrix  $\mathbf{P}' = [\mathbf{p}^1, \dots, \mathbf{p}^{K+C}] \in \mathbb{R}^{d \times (K+C)}$ , and compute the QR-decomposition of the matrix  $\mathbf{P}'$ :

$$\mathbf{P}' = \mathbf{Q}'\mathbf{R}', \quad (2)$$

where  $\mathbf{Q}' = [\mathbf{q}^1, \dots, \mathbf{q}^{K+C}] \in \mathbb{R}^{d \times (K+C)}$  is an column-wise orthogonal matrix with  $\mathbf{Q}'^T \mathbf{Q}' = \mathbf{I}_{K+C}$ , i.e.,  $\forall i \neq j, \mathbf{q}^{i'T} \mathbf{q}^j = 0$  and  $\forall i, \mathbf{q}^{i'T} \mathbf{q}^i = 1$ , and  $\mathbf{R}' \in \mathbb{R}^{(K+C) \times (K+C)}$  is an upper triangular matrix. We then compute the class prototypes of the  $(K + C)$  classes by:

$$\mathbf{Z}' = \sqrt{\frac{K+C}{K+C-1}} \mathbf{Q}' (\mathbf{I}_{K+C} - \frac{1}{K+C} \mathbf{1}_{K+C} \mathbf{1}_{K+C}^T), \quad (3)$$

where  $\mathbf{Z} = [\mathbf{z}^1, \dots, \mathbf{z}^{K+C}] \in \mathbb{R}^{d \times (K+C)}$  is the class prototype matrix and each column  $\mathbf{z}^i \in \mathbb{R}^{d \times 1}$  denotes the class prototype of class  $i$ . For  $\mathbf{z}^i$ , we have:

$$\mathbf{z}^i = \sqrt{\frac{K+C}{K+C-1}} \cdot \left( \mathbf{q}^i - \frac{\sum_{n=1}^{K+C} \mathbf{q}^n}{K+C} \right). \quad (4)$$

Then, for any class prototypes  $\mathbf{z}^{i'}$  and  $\mathbf{z}^{j'}$  in  $\mathbf{Z}'$ ,

$$\begin{aligned} \forall i, j, \mathbf{z}^{i'T} \mathbf{z}^{j'} &= \frac{K+C}{K+C-1} \cdot \left( \mathbf{q}^i - \frac{\sum_{n=1}^{K+C} \mathbf{q}^n}{K+C} \right)^T \\ &\quad \cdot \left( \mathbf{q}^j - \frac{\sum_{n=1}^{K+C} \mathbf{q}^n}{K+C} \right), \\ &= \frac{K+C}{K+C-1} \cdot \left( \mathbf{q}^{i'T} \mathbf{q}^j - \frac{1}{K+C} \right), \\ &= \frac{K+C}{K+C-1} \cdot \delta_{i,j} - \frac{1}{K+C-1}. \end{aligned} \quad (5)$$

where  $\delta_{i,j} = 1$  if  $i = j$  and  $\delta_{i,j} = 0$  if  $i \neq j$ . On this basis, the  $K + C$  prototypes construct an optimal geometry that all the prototypes are unit vectors, i.e.,  $\forall i, \|\mathbf{z}^{i'}\|_2 = \mathbf{z}^{i'T} \mathbf{z}^{i'} = 1$ , and maximally separates the feature space using the  $K + C$  vectors with the same pair-wise angles, i.e.,  $\forall i \neq j, \|\mathbf{z}^{i'}\|_2 = \mathbf{z}^{i'T} \mathbf{z}^{j'} = -\frac{1}{K+C-1}$ . Thus, the  $K + C$  prototypes in  $\mathbf{Z}'$  computed by the DNC algorithm construct an optimal geometry structure classifying  $K + C$  classes.

### B. The proof of Theorem 2

**Theorem 2.** *With  $M$  prototype placeholders, extending existing  $K$ -class prototypes to  $K + C$  ones using the DNC algorithm when  $C$  new class emerged, the upper bound of the old class prototypes is guaranteed, i.e.,  $\forall i = 1, \dots, K, \|\mathbf{z}^i - \mathbf{z}^{i'}\|^2 \leq 2 - 2\sqrt{\frac{(M-1)(M+C)}{M(M+C-1)}}$ , where  $\mathbf{z}^i$  and  $\mathbf{z}^{i'}$  are the old and new prototypes of class  $i$ , respectively.*

**Proof.** For any old class  $i$ , i.e.,  $\forall i = 1, \dots, K$ , its shift distance can be computed by:

$$\begin{aligned} \|\mathbf{z}^i - \mathbf{z}^{i'}\|^2 &= \|\mathbf{z}^i\|^2 + \|\mathbf{z}^{i'}\|^2 - 2 \|\mathbf{z}^i\| \cdot \|\mathbf{z}^{i'}\| \cdot \cos\theta, \\ &= 2 - 2\cos\theta, \end{aligned} \quad (6)$$

where

$$\begin{aligned}
\cos\theta &= \frac{\mathbf{z}^i \mathbf{z}^{i'}}{\|\mathbf{z}^i\| \cdot \|\mathbf{z}^{i'}\|} = \mathbf{z}^{i^T} \mathbf{z}^{i'}, \\
&= \sqrt{\frac{K}{K-1}} \left(\mathbf{q}^i - \frac{\sum \mathbf{q}^n}{K}\right)^T \cdot \sqrt{\frac{K+C}{K+C-1}} \left(\mathbf{q}^i - \frac{\sum \mathbf{q}^m}{K+C}\right), \\
&= \sqrt{\frac{K(K+C)}{(K-1)(K+C-1)}} \left(\mathbf{q}^{i^T} \mathbf{q}^i - \frac{\sum \mathbf{q}^{n^T} \mathbf{q}^i}{K+C} - \right. \\
&\quad \left. \frac{\mathbf{q}^{i^T} \sum \mathbf{q}^m}{K} + \frac{\sum \mathbf{q}^n \sum \mathbf{q}^m}{K(K+C)}\right), \\
&= \sqrt{\frac{K(K+C)}{(K-1)(K+C-1)}} \left(1 - \frac{1}{K+C} - \right. \\
&\quad \left. \frac{1}{K} + \frac{K}{K(K+C)}\right), \\
&= \sqrt{\frac{K(K+C)}{(K-1)(K+C-1)}} \cdot \frac{K-1}{K}, \\
&= \sqrt{\frac{(K-1)(K+C)}{K(K+C-1)}}.
\end{aligned} \tag{7}$$

Then, we have

$$\|\mathbf{z}^i - \mathbf{z}^{i'}\|^2 = 2 - 2\sqrt{\frac{(K-1)(K+C)}{K(K+C-1)}}. \tag{8}$$

When  $C \geq 1$ , Eq. (8) is a monotonical decreasing function *w.r.t* the increase of  $K$ . By adding  $M$  placeholders in our DNC algorithm, we have  $K \geq M$ , the upper bound of the drift distance can be guaranteed, *i.e.*,  $\|\mathbf{z}^i - \mathbf{z}^{i'}\|^2 \leq 2 - 2\sqrt{\frac{(M-1)(M+C)}{M(M+C-1)}}$ .
